# Supplementary material for: Synthesis of two novel indolo[3,2-b]carbazole derivatives with aggregation-enhanced emission property
Source: Royal Society of Chemistry journal article supplement (doi:10.1039/c3tc31590h), 2013-01-01
Supplement: c3tc31590h.pdf [file c3tc31590h.pdf]

Supporting Information for:

## **Synthesis of two novel indolo[3,2-b]carbazole derivatives with aggregation-enhanced emission property**

Wen-Bin Jia, Hao-Wei Wang, Long-Mei Yang, Hong-Bo Lu, Lin Kong,  
Yu-Peng Tian, Xu-Tang Tao, Jia-Xiang Yang

### **Contents**

1. Preparation of compound **2**
2. TGA curves of **3** and **4**
3. Normalized PL spectra of **3** in THF solutions with different concentrations
4. UV-Vis absorption and PL of **4** in thin film
5. The volume fractions of water effect on the absorption and fluorescence spectra of **3** and **4** in THF/water mixtures
6. Plot of Stokes shift ( $\Delta\nu$ ) of **3** and **4** versus  $\Delta f$
7. UV-Vis and FL. data of **3** and **4** in different polarity solvents
8. Crystal data and details of collection and refinement for **4**
9. Weak interaction parameters for **4**
10. Selected bond lengths [ $\text{\AA}$ ] and angles [ $^\circ$ ] for **4**
11.  $^1\text{H}$  NMR spectra of **3** and **4**.
12. Mass spectra of **3** and **4**.

### Preparation of 5,11-dihexyl-6,12-di-p-tolyl-5,11-dihydroindolo[3,2-b]carbazole-2,8-dicarbaldehyde (compound 2)

DMF (7.4 mL, 100 mmol) was added in a 250 mL RBF, then gradually added drop-wise  $\text{POCl}_3$  (9.2 mL, 100 mmol) until forming frozen salt in ice-bath. **1** (0.604 g, 1 mmol) was dissolved in 100 mL dichloromethane, added drop-wise in the above mixture at room temperature. The reaction mixture was refluxed for 24 h. Poured the mixture into ice water, adjusted pH to 7, extracted with 500 mL of  $\text{CH}_2\text{Cl}_2$  and the organic layer was washed three times with distilled water, and then dried over anhydrous magnesium sulfate overnight. The solvent was removed under reduced pressure. The residue was purified by column chromatography (dichloromethane: petroleum ether = 3:5). Yield: 0.4 g (60%).  $^1\text{H}$  NMR ( $\text{CDCl}_3$ , 400 MHz)  $\delta$  (ppm): 0.850-0.897 (t, 6H), 0.916-0.973 (m, 4H), 1.081-1.155 (m, 4H), 1.191-1.278 (m, 4H), 1.526-1.606 (m, 4H), 2.623 (s, 6H), 3.905-3.946 (t, 4H), 6.911-6.914 (d,  $J = 1.2$  Hz, 2H), 7.327-7.349 (d,  $J = 8.8$  Hz, 2H), 7.499-7.519 (d,  $J = 8.0$  Hz, 4H), 7.542-7.562 (d,  $J = 8.0$  Hz, 4H), 7.917-7.942 (m, 2H), 9.597 (s, 2H); FT-IR (KBr)  $\nu$  ( $\text{cm}^{-1}$ ): 2926, 2851, 1685, 1603, 1566, 1503, 1347, 1240, 1198, 1081, 814, 732; MALDI-TOF MS:  $m/z = 660.06$  ( $[\text{M}-\text{H}]^+$ ), calcd for  $\text{C}_{46}\text{H}_{48}\text{N}_2\text{O}_2$ : 660.89.

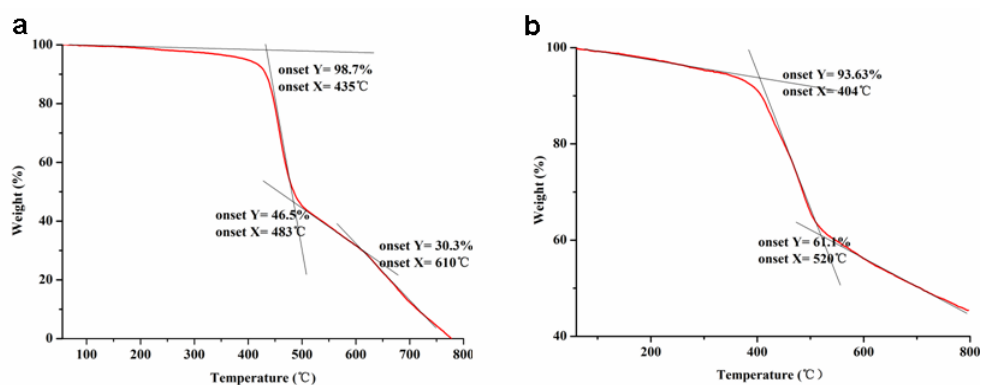

Fig. S1 TGA curves of compounds **3** (a) and **4** (b)

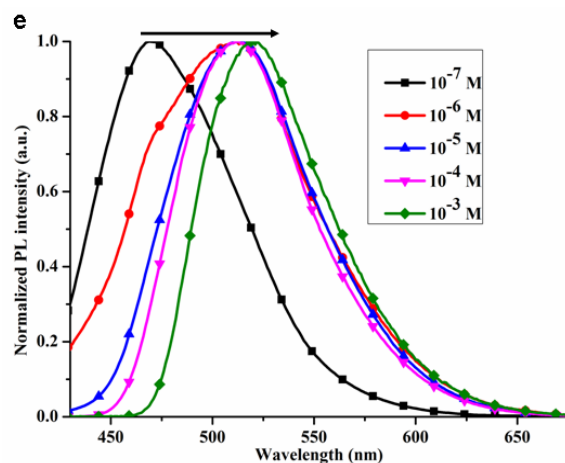

Fig. S2 Normalized PL spectra of **3** in THF solutions with different concentrations.

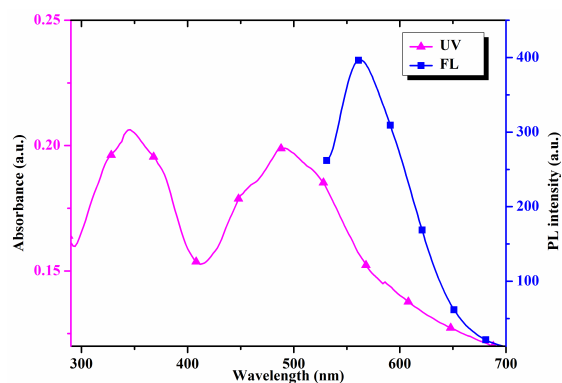

Fig. S3 UV-Vis absorption and PL of **4** in thin film

Table S1 The volume fractions of water effect on the absorption and fluorescence spectra of **3** in THF/water mixtures

| Compound  | Water vol. fraction /% | $\lambda_{ex} / nm$ <sup>[a]</sup> | $\lambda_{em} / nm$ <sup>[b]</sup> |
|-----------|------------------------|------------------------------------|------------------------------------|
| <b>3</b>  | 0                      | 345, 412                           | 499                                |
|           | 10                     | 345, 412                           | 513                                |
|           | 20                     | 345, 413                           | 516                                |
|           | 30                     | 345, 413                           | 518                                |
|           | 40                     | 345, 415                           | 520                                |
|           | 50                     | 345, 415                           | 517                                |
|           | 60                     | 345, 435                           | 482, 569                           |
|           | 70                     | 350, 440                           | 489, 573                           |
|           | 80                     | 345, 425                           | 502, 573                           |
|           | 90                     | 345, 430                           | 495, 575                           |
|           | 100                    | 350, 430                           | 495, 557                           |
| Thin film |                        | 344, 432                           | 440, 544                           |

<sup>[a]</sup> Absorption maximum. <sup>[b]</sup> Emission maximum.

**Table S2** The volume fractions of water effect on the absorption and fluorescence spectra of **4** in THF/water mixtures

| Compound | Water vol. fraction /% | $\lambda_{ex} / nm$ <sup>[a]</sup> | $\lambda_{em} / nm$ <sup>[b]</sup> |
|----------|------------------------|------------------------------------|------------------------------------|
| <b>4</b> | 0                      | 337, 462                           | 559                                |
|          | 10                     | 337, 463                           | 563                                |
|          | 20                     | 338, 464                           | 565                                |
|          | 30                     | 339, 465                           | 569                                |
|          | 40                     | 342, 462                           | 567                                |
|          | 50                     | 342, 468                           | 560                                |
|          | 60                     | 343, 490                           | 564                                |
|          | 70                     | 342, 488                           | 574                                |
|          | 80                     | 342, 484                           | 574                                |
|          | 90                     | 343, 481                           | 573                                |
|          | 100                    | 338, 468                           | 579                                |
|          | Thin film              |                                    | 345, 490                           |

<sup>[a]</sup> Absorption maximum. <sup>[b]</sup> Emission maximum.

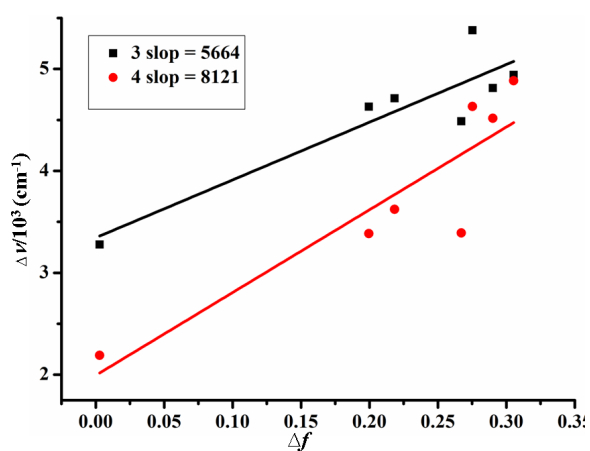

**Fig. S4** Plot of Stokes shift ( $\Delta\nu$ ) of **3** and **4** versus  $\Delta f$  of their solutions.

**Table S3.** UV-Vis and FL. data of **3** in different polarity solvents

| <i>Comp.</i> | <i>Solvent</i>   | $\lambda_{ex} / nm$ <sup>[a]</sup> | $\epsilon / 10^3 [\epsilon]$ <sup>[b]</sup> | $\lambda_{em} / nm$ <sup>[c]</sup> | $\Phi_F$ <sup>[d]</sup> | $\Delta\nu / cm^{-1}$ <sup>[e]</sup> |
|--------------|------------------|------------------------------------|---------------------------------------------|------------------------------------|-------------------------|--------------------------------------|
| <b>3</b>     | benzene          | 347, 414                           | 37.7                                        | 479                                | 0.0990                  | 3277.76                              |
|              | DCM              | 345, 417                           | 61.5                                        | 519                                | 0.0656                  | 4712.99                              |
|              | THF              | 345, 417                           | 52.1                                        | 513                                | 0.0757                  | 4487.64                              |
|              | acetic<br>ether  | 344, 408                           | 52.9                                        | 503                                | 0.0590                  | 4629.09                              |
|              | ethanol          | 344, 414                           | 47.0                                        | 517                                | 0.0468                  | 4812.23                              |
|              | acetonitril<br>e | 344, 410                           | 49.3                                        | 537                                | 0.0389                  | 5768.27                              |
|              | DMSO             | 347, 420                           | 42.5                                        | 530                                | 0.1082                  | 4941.60                              |
|              | DMF              | 345, 413                           | 52.2                                        | 531                                | 0.0560                  | 5380.68                              |

<sup>[a]</sup> Absorption maximum. <sup>[b]</sup> Maximum molar extinction coefficient. <sup>[c]</sup> Emission maximum. <sup>[d]</sup> Fluorescence quantum yield. <sup>[e]</sup> Stokes shift ( $cm^{-1}$ ).

**Table S4.** UV-Vis and FL. data of **4** in different polarity solvents

| <i>Comp.</i> | <i>Solvent</i> | $\lambda_{ex} / nm$ <sup>[a]</sup> | $\epsilon / 10^3 [\epsilon]$ <sup>[b]</sup> | $\lambda_{em} / nm$ <sup>[c]</sup> | $\Phi_F$ <sup>[d]</sup> | $\Delta\nu / cm^{-1}$ <sup>[e]</sup> |
|--------------|----------------|------------------------------------|---------------------------------------------|------------------------------------|-------------------------|--------------------------------------|
| <b>4</b>     | benzene        | 337, 462                           | 211                                         | 514                                | 0.2498                  | 2189.76                              |
|              | DCM            | 338, 469                           | 241                                         | 565                                | 0.3381                  | 3622.84                              |
|              | THF            | 336, 460                           | 172                                         | 545                                | 0.4799                  | 3390.50                              |
|              | ethyl acetate  | 334, 458                           | 234                                         | 542                                | 0.4746                  | 3383.87                              |
|              | ethanol        | 335, 459                           | 39.0                                        | 579                                | 0.0869                  | 4515.33                              |
|              | acetonitrile   | 335, 455                           | 62.0                                        | 585                                | 0.0766                  | 4884.00                              |
|              | DMSO           | 336, 468                           | 58.0                                        | 598                                | 0.0286                  | 4475.62                              |
|              | DMF            | 336, 464                           | 194                                         | 591                                | 0.0290                  | 4631.25                              |

<sup>[a]</sup> Absorption maximum. <sup>[b]</sup> Maximum molar extinction coefficient. <sup>[c]</sup> Emission maximum. <sup>[d]</sup> Fluorescence quantum yield. <sup>[e]</sup> Stokes shift ( $cm^{-1}$ ).

**Table S5** Crystal data and details of collection and refinement for **4**

|                                                 |                                                |                            |                                 |
|-------------------------------------------------|------------------------------------------------|----------------------------|---------------------------------|
| compound                                        | <b>4</b>                                       | a [Å]                      | 9.2346(14)                      |
| empirical formula                               | C <sub>52</sub> H <sub>48</sub> N <sub>6</sub> | b [Å]                      | 10.1144(15)                     |
| formula weight                                  | 756.39                                         | c [Å]                      | 24.687(4)                       |
| temperature (K)                                 | 296(2)                                         | $\alpha$ [deg]             | 79.828(2)                       |
| crystal system                                  | triclinic                                      | $\beta$ [deg]              | 89.103(2)                       |
| space group                                     | <i>P</i> -1                                    | $\gamma$ [deg]             | 72.210(2)                       |
| Z                                               | 64                                             | <i>V</i> [Å <sup>3</sup> ] | 2159.2(6)                       |
| <i>D</i> <sub>calcd</sub> [g·cm <sup>-3</sup> ] | 1.164                                          | $\mu$ [mm <sup>-1</sup> ]  | 0.069                           |
| <i>F</i> (000)                                  | 804                                            | GOF                        | 1.030                           |
| Crystal size (mm)                               | 0.30 × 0.20 × 0.20                             | Completeness to theta =    | 99.0 %                          |
|                                                 |                                                | 24.71                      |                                 |
| $\theta$ range [°]                              | 0.84-24.71                                     | Reflections collected /    | 15177/7278                      |
|                                                 |                                                | unique                     | [R(int) = 0.0214]               |
| Final R indices                                 | <i>R</i> <sub>1</sub> = 0.0581,                | R indices (all data)       | <i>R</i> <sub>1</sub> = 0.1183, |
| [I>2sigma(I)]                                   | <i>wR</i> <sub>2</sub> = 0.1315                |                            | <i>wR</i> <sub>2</sub> = 0.1522 |

**Table S6** Weak interaction parameters for **4**

| <i>D</i> -H... <i>A</i> <sup>a</sup> | <i>D</i> -H | H... <i>A</i> | <i>D</i> ... <i>A</i> | <i>D</i> -H... <i>A</i> |
|--------------------------------------|-------------|---------------|-----------------------|-------------------------|
| C19-H19...N3 <sup>i</sup>            | 0.930       | 2.649         | 3.534                 | 159.36                  |
| C33-H33...N3 <sup>ii</sup>           | 0.931       | 2.652         | 3.488                 | 149.96                  |
| C12-H12...N4 <sup>iii</sup>          | 0.930       | 2.705         | 3.421                 | 134.46                  |
| C52-H52B...N4 <sup>iv</sup>          | 0.970       | 2.748         | 3.657                 | 158.54                  |
| C15-H15...N5 <sup>v</sup>            | 0.930       | 2.708         | 3.423                 | 134.31                  |
| C46-H46B...N5 <sup>vi</sup>          | 0.959       | 2.734         | 3.658                 | 161.85                  |
| C23-H23...N6 <sup>vii</sup>          | 0.930       | 2.652         | 3.489                 | 150.03                  |
| C8-H8...N6 <sup>viii</sup>           | 0.930       | 2.653         | 3.537                 | 159.09                  |

**Table S7.** Bond lengths [Å] and angles [°] for **4**

|             |          |              |          |
|-------------|----------|--------------|----------|
| C(1)-C(6)   | 1.394(4) | C(2)-C(31)   | 1.455(4) |
| C(4)-N(1)   | 1.406(4) | C(29)-N(3)   | 1.145(5) |
| C(30)-N(4)  | 1.142(5) | C(32)-N(2)   | 1.375(4) |
| C(39)-N(6)  | 1.145(5) | C(40)-N(5)   | 1.145(5) |
| C(41)-N(1)  | 1.474(4) | C(44)-H(44A) | 0.9700   |
| C(45)-C(46) | 1.511(7) | C(46)-H(46C) | 0.9600   |
| C(47)-N(2)  | 1.476(4) | C(47)-C(48)  | 1.513(5) |
| C(48)-C(49) | 1.524(5) | C(49)-C(50)  | 1.463(6) |
| C(50)-C(51) | 1.510(6) | C(51)-C(52)  | 1.491(7) |

|                   |          |                     |          |
|-------------------|----------|---------------------|----------|
| C(6)-C(1)-N(2)    | 129.8(3) | N(2)-C(1)-C(2)      | 108.6(3) |
| C(3)-C(4)-N(1)    | 129.4(3) | C(4)-C(3)-C(14)     | 127.5(3) |
| C(10)-C(11)-H(11) | 119.2    | N(3)-C(29)-C(28)    | 177.8(4) |
| N(4)-C(30)-C(28)  | 178.5(5) | N(2)-C(32)-C(33)    | 128.2(3) |
| N(2)-C(32)-C(31)  | 110.0(3) | N(1)-C(41)-H(41B)   | 108.8    |
| C(22)-N(1)-C(4)   | 108.7(3) | C(1)-N(2)-C(47)     | 128.4(3) |
| C(24)-C(25)-C(27) | 125.7(3) | C(27)-C(28)-C(29)   | 126.2(4) |
| C(36)-C(31)-C(32) | 118.7(3) | C(36)-C(31)-C(2)    | 134.6(3) |
| C(32)-C(33)-H(33) | 121.0    | C(36)-C(35)-C(34)   | 118.9(3) |
| C(31)-C(36)-C(35) | 120.8(3) | C(38)-C(37)-C(35)   | 133.0(4) |
| N(6)-C(39)-C(38)  | 177.3(4) | N(5)-C(40)-C(38)    | 179.4(5) |
| N(1)-C(41)-H(41A) | 108.8    | H(41A)-C(41)-H(41B) | 107.7    |
| C(41)-C(42)-C(43) | 115.3(4) | C(43)-C(42)-H(42A)  | 108.4    |
| N(2)-C(47)-H(47B) | 108.9    | C(22)-N(1)-C(4)     | 108.7(3) |
| C(22)-N(1)-C(41)  | 123.0(3) | C(4)-N(1)-C(41)     | 128.2(3) |
| C(32)-N(2)-C(47)  | 123.2(3) | C(1)-N(2)-C(47)     | 128.4(3) |

---

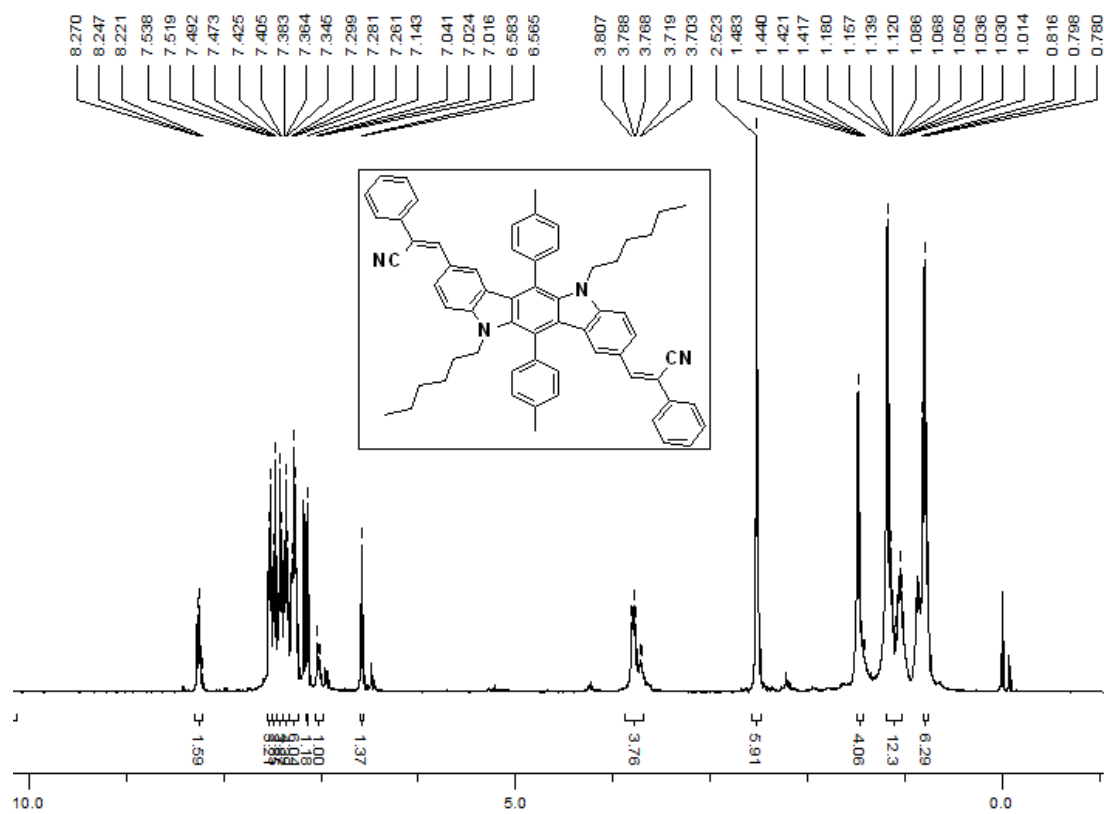

Fig. S5 <sup>1</sup>H NMR spectrum of compound 3

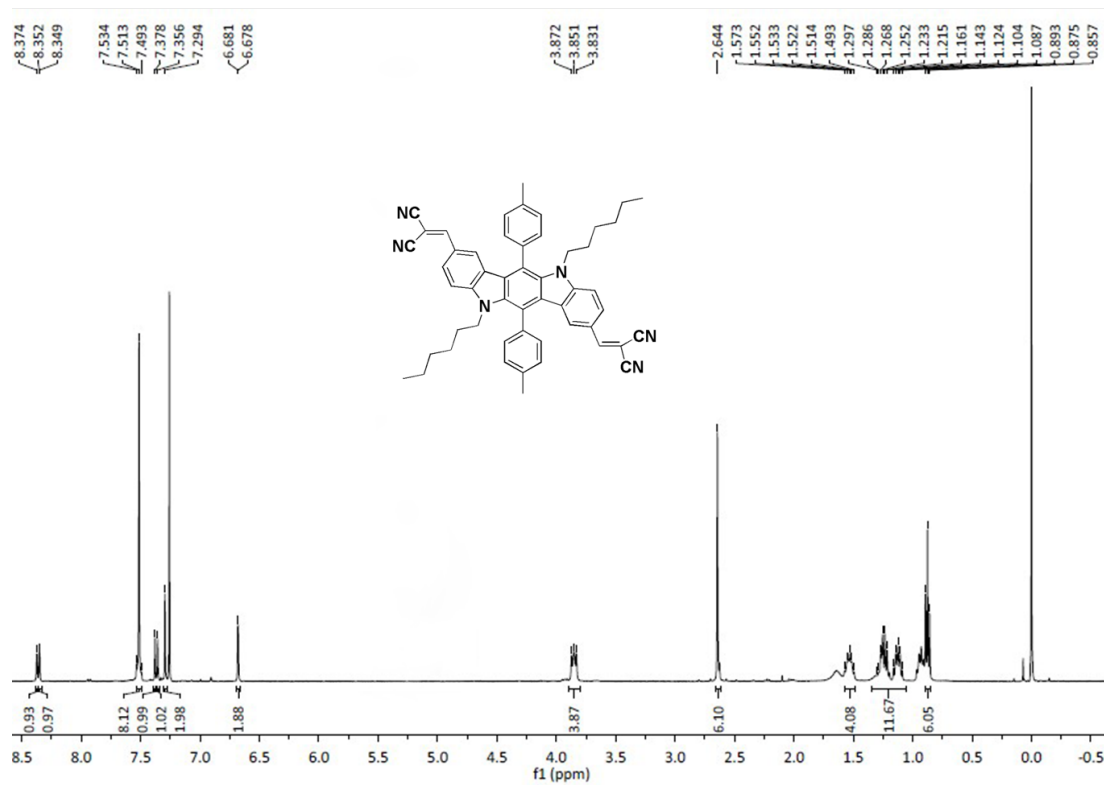

Fig. S6 <sup>1</sup>H NMR spectrum of compound 4



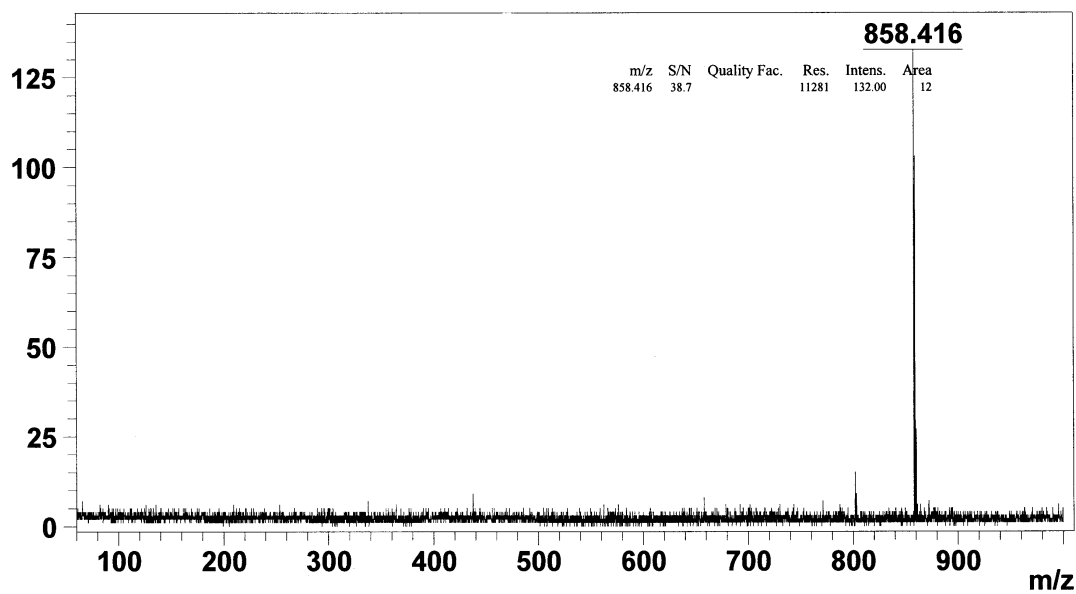

Fig. S7 Mass spectrum of compound 3

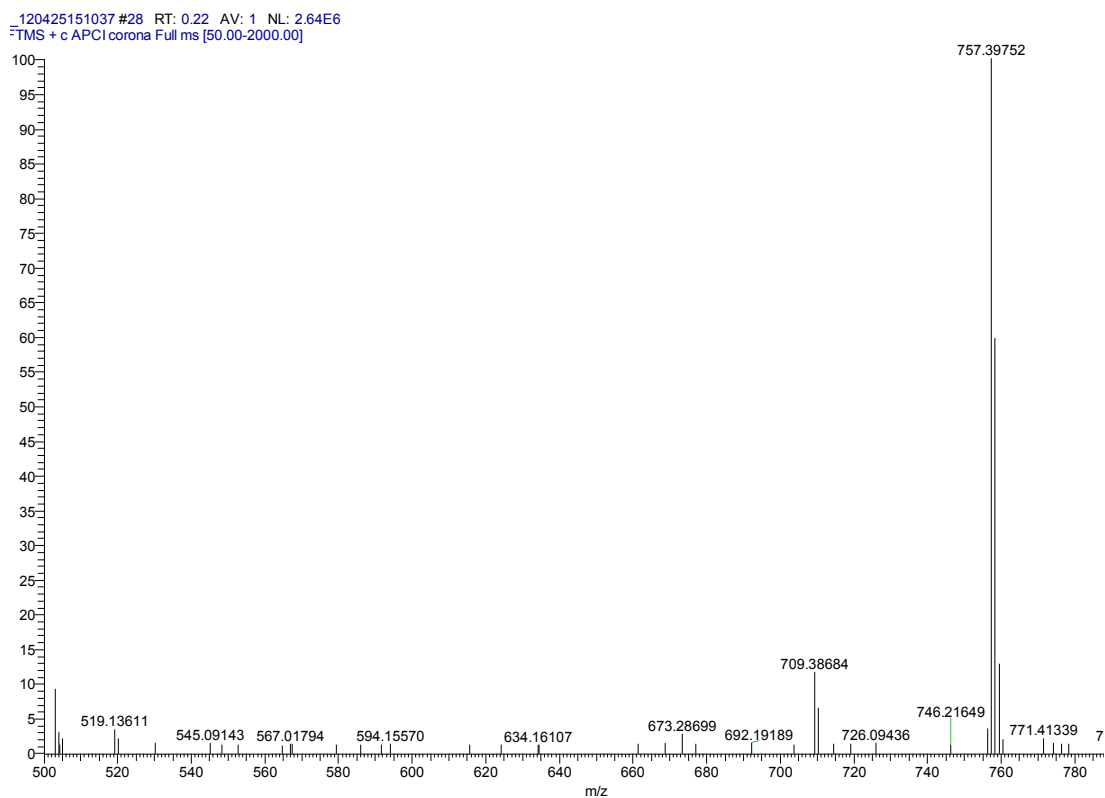

Fig. S8 Mass spectrum of compound 4
